# Supplementary material for: Enablers and barriers to success among mothers planning to exclusively breastfeed for six months: a qualitative prospective cohort study in KwaZulu-Natal, South Africa
Source: Springer Nature journal article supplement (doi:10.1186/s13006-017-0135-8), 2017-10-03
Supplement: MOESM1 [file 15101272]

## KWAZULU-NATAL INITIATIVE FOR BREASTFEEDING SUPPORT:

### *In-depth interview guide Visit 2.*

***NB:*** Before beginning the interview, ***position*** the microphone near to interviewer and interviewee, ***turn it on and talk into the microphone*** the following information:

- *Area code*
- *Mother code*
- *Visit number (1-6)*

*E.G. "This is (your name) I am conducting an interview in area 01 on mother 7 and it is visit number 3".*

#### General:

1. How have things been going with feeding your baby?

#### Antenatal question:

1. When you were pregnant did anyone advise you on the feeding of your baby?

*Probe: who and what? In the clinic? Family or friends?*

#### Post labour:

1. Can you tell me what happened directly after the baby was born?

*Probe*

- a. *When did you first hold the baby?*
- b. *Did they put the baby on your chest?*
- c. *How soon after birth did you feed your baby?*

2. Describe the experience you had in starting to feed your baby in the hospital.
3. Was your baby given anything to drink BEFORE you started feeding him/her?
4. Did anyone help you with the feeding of your baby in the hospital?

*Probes:*

- a. *Nurses/ lactation advisors*
- b. *Did you experience any challenges in feeding your baby while you were in the hospital?*
5. Did a lactation advisor (XXX name) help you with feeding your baby in the hospital?
6. When you got home did you experience any challenges in feeding your baby?
